# Supplementary material
Source: PubMed Central journal article supplement (PMC2937495)
Supplement: supp_76_18_6318__1.pdf [file supp_76_18_6318__1.pdf]

Supplementary Table 1: List of mutants and designated *spo0A* mutations, ordered by mutation type. For alignments, *spo0A* (GBAA\_4394) from *B. anthracis* strain Ames Ancestor or *B. subtilis* str. 168 served as template. MS = missense, NS = nonsense, INS = insertion, DEL = deletion, DUP = duplication, FS = frameshift.

| SPO Mutants        | No. of isolates | Mutation type | Nucleotide change(s)       | Amino acid change | Amino acid in <i>B. subtilis</i> |
|--------------------|-----------------|---------------|----------------------------|-------------------|----------------------------------|
| 107                | 1               | MS            | A32G                       | D11G              | D11                              |
| 22                 | 1               | MS            | T158C                      | L53P              | L53                              |
| 12                 | 1               | MS            | T473C and A673G            | I158T and N225D   | I157, N228                       |
| 31, 121            | 2               | MS            | C596A                      | A199E             | A202                             |
| 23, 26             | 2               | MS            | G623A                      | R208H             | R211                             |
| 91, 117            | 2               | MS            | C631T                      | R211C             | R214                             |
| 126                | 1               | MS            | C640A                      | R214C             | R217                             |
| 5, 75              | 2               | MS            | C647T                      | A216V             | A219                             |
| 102, 124           | 1               | MS            | G646A                      | A216T             | A219                             |
| 119                | 1               | MS            | C740T                      | S247F             | S250                             |
| 101, 106, 115, 133 | 4               | MS            | C527T                      | A176V             | A179                             |
| 108, 110           | 2               | MS            | A574G                      | K192E             | K195                             |
| 54                 | 1               | NS            | C145T                      | Stop after K48    | K48                              |
| 55, 128, 129       | 3               | NS            | C235T                      | Stop after R78    | K78                              |
| 132                | 1               | NS            | G742T                      | Stop after S247   | S250                             |
| 111                | 1               | SIL           | A156G                      | V52V              | V52                              |
| 116                | 1               | DEL(3 bp)     | TAT position 168-170       | Deletion of I57   | I57                              |
| 114                | 1               | DEL(1 bp)     | C148                       | FS after Q49      | D49                              |
| LL44*              | 1               | DEL (2116 bp) | Starting after A156        | Stop after L55    | L55                              |
| 120                | 1               | DEL (1 bp)    | T192                       | FS after G64      | G64                              |
| 105                | 1               | DEL (7 bp)    | TTCATAT position 306-312   | FS after Y104     | Y104                             |
| 18                 | 1               | DEL (4 bp)    | GCGG position 368-371      | FS after V122     | V122                             |
| 46                 | 1               | DEL (5 bp)    | TAATA position 606-610     | FS after N203     | N206                             |
| 63                 | 1               | INS (1 bp)    | G after position 39        | FS after K13      | R13                              |
| 7                  | 1               | INS (1 bp)    | A after position 282       | FS after K96      | K96                              |
| 112                | 1               | DUP (7 bp)    | TTCATAT after position 305 | FS after I106     | I106                             |
| 127                | 1               | DUP(80 bp)    | 409-569 duplicated         | FS after I190     | I193                             |

\* LL44 was derived from parental strain UM44-1C9 in an independent experiment.
